# Supplementary material
Source: ML conference proceedings conference paper supplement (https://openreview.net/forum?id=VW1IUYn6re)

Avg ChangeOvers.

23  
22  
21  
20

2

4

6

8

10

12

14

*Iter*

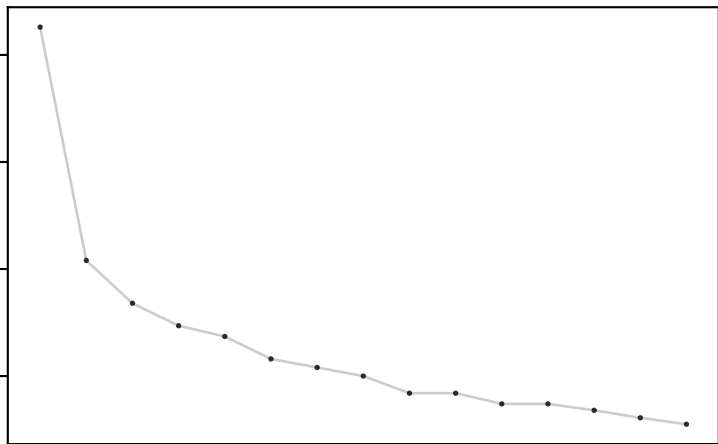

Supplement: supplementary_material [file attachment]

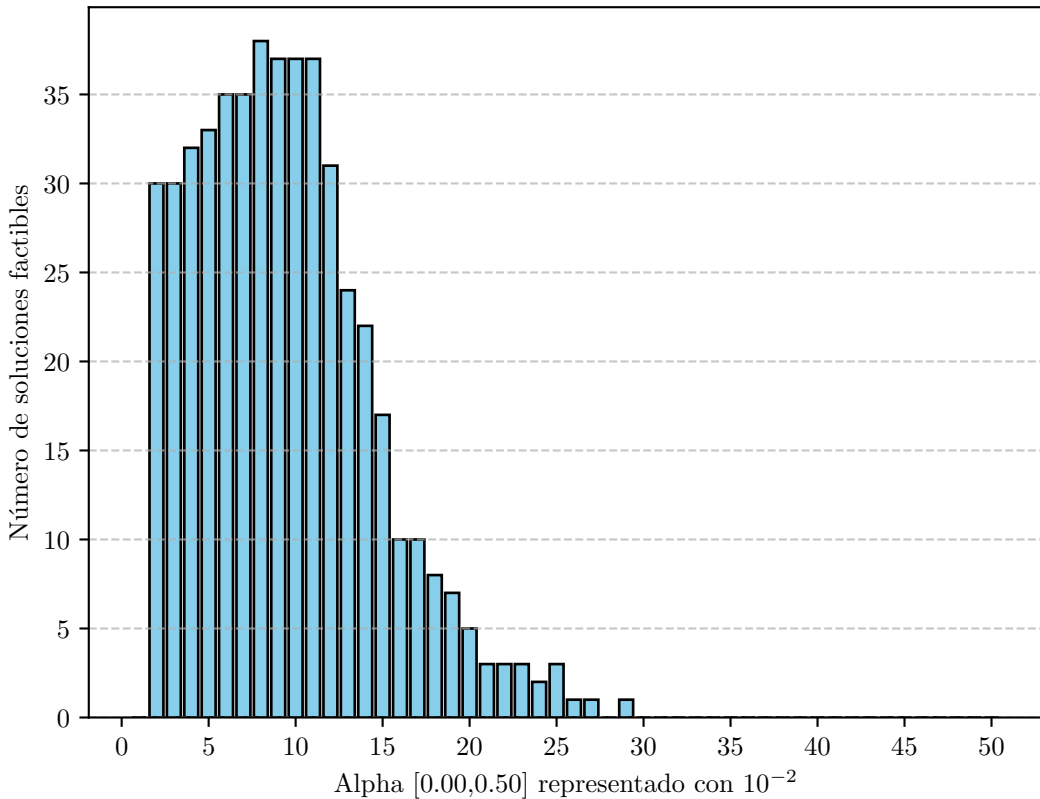

Supplement: supplementary_material [file attachment]

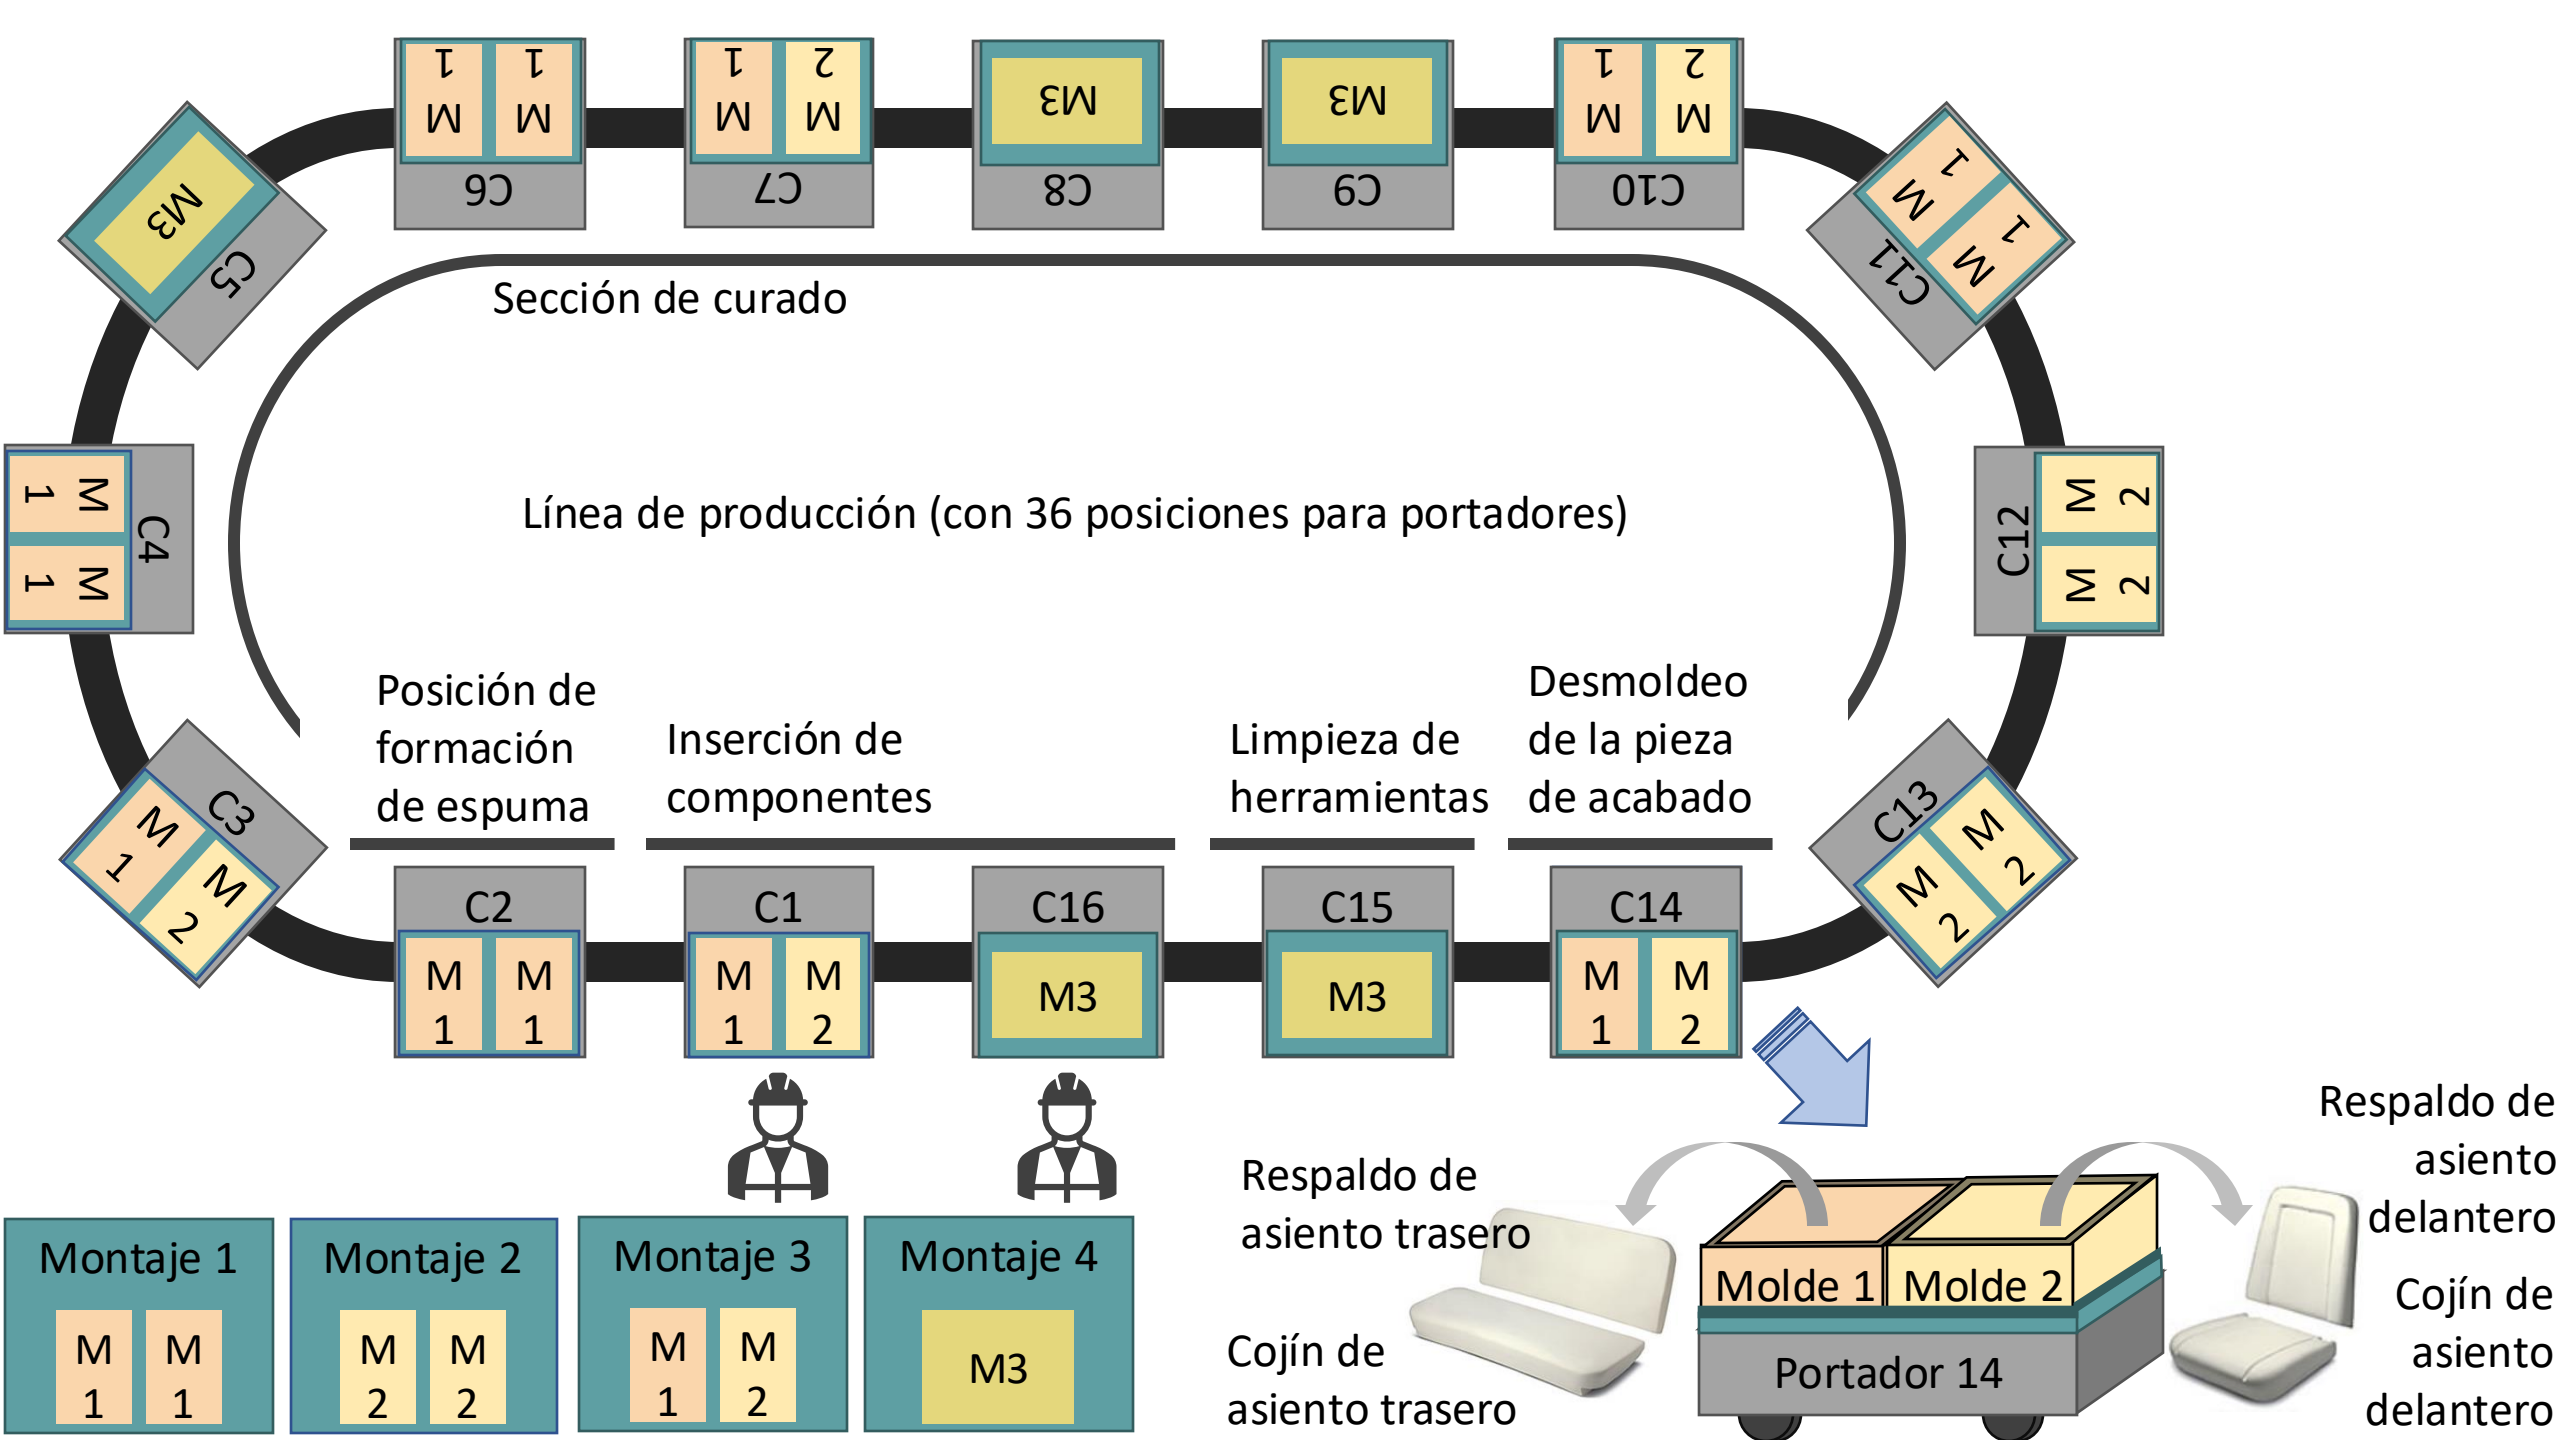

Supplement: supplementary_material [file attachment]

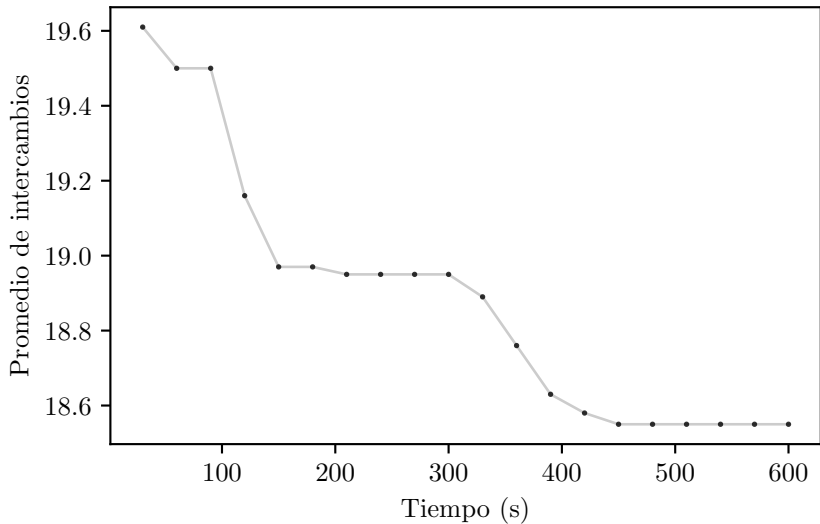

Supplement: supplementary_material [file attachment]
